# Supplementary material for: De novo design of high-affinity binders of bioactive helical peptides
Source: PubMed Central journal article supplement (PMC10849960; doi:10.1038/s41586-023-06953-1), 2023-12-18
Supplement: 41586_2023_6953_MOESM3_ESM.pdf [file 41586_2023_6953_MOESM3_ESM.pdf]

|              | 29 |   |   |   |   | 361 |   |   |   |   |
|--------------|----|---|---|---|---|-----|---|---|---|---|
| Strep. beads | -  | + | + | + | + | -   | + | + | + | + |
| Bid-BTN      | -  | + | + | - | - | -   | + | + | - | - |
| L            | U  | B | U | B | U | B   | U | B |   |   |

|              | 410 |   |   |   |   | 411 |   |   |   |   |
|--------------|-----|---|---|---|---|-----|---|---|---|---|
| Strep. beads | -   | + | + | + | + | -   | + | + | + | + |
| Bid-BTN      | -   | + | + | - | - | -   | + | + | - | - |
| L            | U   | B | U | B | U | B   | U | B |   |   |

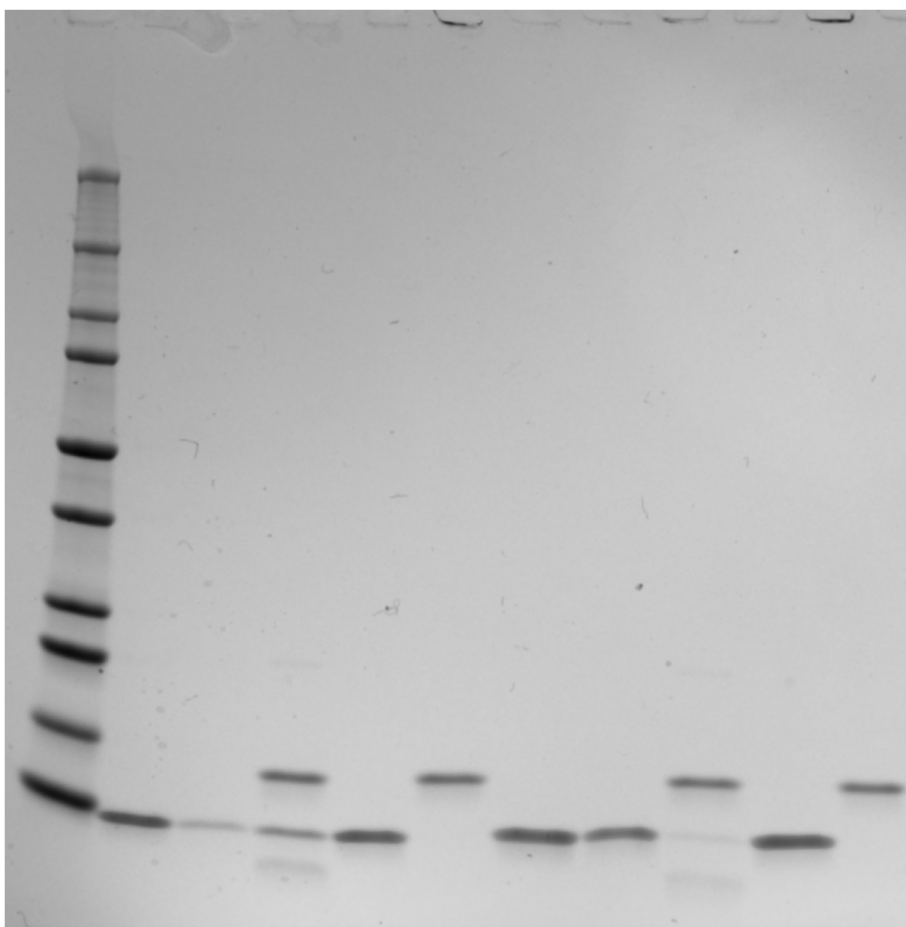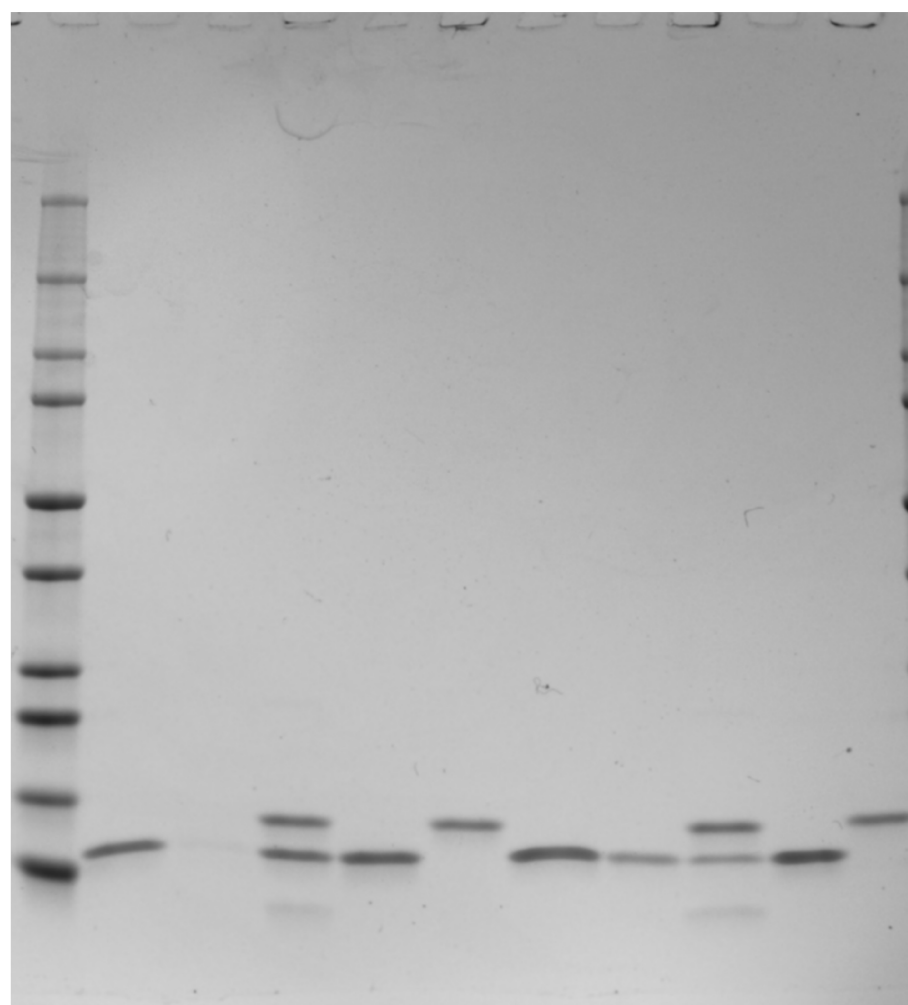

Strept.  
Binder  
Bid
